# Supplementary material for: Autophagy-Related Gene Signature Highlights Metabolic and Immunogenic Status of Malignant Cells in Non-Small Cell Lung Cancer Adenocarcinoma
Source: Cancers (Basel). 2022 Jul 16;14(14):3462. doi: 10.3390/cancers14143462 (PMC9317787; doi:10.3390/cancers14143462)
Supplement: Supplementary file 1 [file cancers-14-03462-s001.zip]

Archive with 6 entries (6 files):
- supplementary figures.pdf
- Table S1 .xlsx
- Table S2.xlsx
- Table S3.xlsx
- Table S4.xlsx
- Table S5.xlsx
