# Supplementary material for: Autophagy-Related Gene Signature Highlights Metabolic and Immunogenic Status of Malignant Cells in Non-Small Cell Lung Cancer Adenocarcinoma
Source: Cancers (Basel). 2022 Jul 16;14(14):3462. doi: 10.3390/cancers14143462 (PMC9317787; doi:10.3390/cancers14143462)
Supplement: Supplementary file 1 [file cancers-14-03462-s001.zip › Table S1 .xlsx]

## Sheet: Sheet1
Table S1. Statistical report for figure S3A
Cells	group1	group2	n1	n2	statistic	df	p	p.adj	p.adj.signif
HAD	Malignant	Endothelial	21	23	-0.558531	41.6193	0.579	0.6948	ns
HAD	Malignant	Fibroblast	21	22	0.258375	40.1758	0.797	0.896625	ns
HAD	Malignant	Pan immune	21	22	1.59256	40.6728	0.119	0.5895	ns
HAD	Endothelial	Fibroblast	23	22	0.770992	40.7114	0.445	0.658286	ns
HAD	Endothelial	Pan immune	23	22	2.21021	42.9985	0.032	0.576	ns
HAD	Fibroblast	Pan immune	22	22	1.1799	39.884	0.245	0.658286	ns
GC	Malignant	Endothelial	21	23	-0.667259	41.2063	0.508	0.658286	ns
GC	Malignant	Fibroblast	21	22	0.0623611	40.6541	0.951	0.951	ns
GC	Malignant	Pan immune	21	22	0.781266	39.843	0.439	0.658286	ns
GC	Endothelial	Fibroblast	23	22	0.688646	40.862	0.495	0.658286	ns
GC	Endothelial	Pan immune	23	22	1.54061	42.9548	0.131	0.5895	ns
GC	Fibroblast	Pan immune	22	22	0.661941	39.3755	0.512	0.658286	ns
Core	Malignant	Endothelial	21	23	-1.0191	41.627	0.314	0.658286	ns
Core	Malignant	Fibroblast	21	22	-0.118066	40.0455	0.907	0.951	ns
Core	Malignant	Pan immune	21	22	0.749032	40.7039	0.458	0.658286	ns
Core	Endothelial	Fibroblast	23	22	0.799396	40.5255	0.429	0.658286	ns
Core	Endothelial	Pan immune	23	22	1.81866	42.9963	0.076	0.5895	ns
Core	Fibroblast	Pan immune	22	22	0.79609	39.7659	0.431	0.658286	ns
