# Supplementary material for: Autophagy-Related Gene Signature Highlights Metabolic and Immunogenic Status of Malignant Cells in Non-Small Cell Lung Cancer Adenocarcinoma
Source: Cancers (Basel). 2022 Jul 16;14(14):3462. doi: 10.3390/cancers14143462 (PMC9317787; doi:10.3390/cancers14143462)
Supplement: Supplementary file 1 [file cancers-14-03462-s001.zip › Table S2.xlsx]

## Sheet: Sheet1
Table S2. Statistical report for figure 5B.
signature	group1	group2	n1	n2	statistic	df	p	p.adj	p.adj.signif
Signature A	Malignant	Endothelial	21	23	-2.43678	41.8563	0.019	0.038	*
Signature A	Malignant	Fibroblast	21	22	-1.73059	40.9503	0.091	0.156	ns
Signature A	Malignant	Pan immune	21	22	1.25145	35.4068	0.219	0.292	ns
Signature A	Endothelial	Fibroblast	23	22	0.623316	42.6283	0.536	0.584727	ns
Signature A	Endothelial	Pan immune	23	22	4.1219	38.5361	0.000193	0.00086	***
Signature A	Fibroblast	Pan immune	22	22	3.20639	35.6299	0.003	0.0072	**
Signature B	Malignant	Endothelial	21	23	4.09342	37.8203	0.000215	0.00086	***
Signature B	Malignant	Fibroblast	21	22	3.14223	38.6012	0.003	0.0072	**
Signature B	Malignant	Pan immune	21	22	5.19317	39.1529	6.73e-06	8.076e-05	****
Signature B	Endothelial	Fibroblast	23	22	0.0697321	33.2601	0.945	0.945	ns
Signature B	Endothelial	Pan immune	23	22	1.4555	42.3866	0.153	0.2295	ns
Signature B	Fibroblast	Pan immune	22	22	0.969152	35.1101	0.339	0.4068	ns
