# Supplementary material for: Autophagy-Related Gene Signature Highlights Metabolic and Immunogenic Status of Malignant Cells in Non-Small Cell Lung Cancer Adenocarcinoma
Source: Cancers (Basel). 2022 Jul 16;14(14):3462. doi: 10.3390/cancers14143462 (PMC9317787; doi:10.3390/cancers14143462)
Supplement: Supplementary file 1 [file cancers-14-03462-s001.zip › Table S3.xlsx]

## Sheet: Sheet1
Table S3. Statistical report for figure 5C.
Signature A	Cells	.y.	group1	group2	n1	n2	statistic	df	p	p.adj	p.adj.signif
Signature A	CASP1	expression	Malignant	Endothelial	21	23	-4.00713	37.6144	0.00028	0.00113647	**
Signature A	CASP1	expression	Malignant	Fibroblast	21	22	-1.26106	40.8473	0.214	0.292396	ns
Signature A	CASP1	expression	Malignant	Pan immune	21	22	-4.93113	32.4744	2.35e-05	0.000170684	***
Signature A	CASP1	expression	Endothelial	Fibroblast	23	22	2.66026	39.8149	0.011	0.0261724	*
Signature A	CASP1	expression	Endothelial	Pan immune	23	22	-0.778267	41.2875	0.441	0.50715	ns
Signature A	CASP1	expression	Fibroblast	Pan immune	22	22	-3.51434	34.6827	0.001	0.00313636	**
Signature A	CX3CL1	expression	Malignant	Endothelial	21	23	-5.14039	41.8779	6.79e-06	5.85637e-05	****
Signature A	CX3CL1	expression	Malignant	Fibroblast	21	22	1.46188	40.8404	0.151	0.228989	ns
Signature A	CX3CL1	expression	Malignant	Pan immune	21	22	8.16353	28.0986	6.73e-09	1.32677e-07	****
Signature A	CX3CL1	expression	Endothelial	Fibroblast	23	22	6.32563	42.9969	1.23e-07	1.54309e-06	****
Signature A	CX3CL1	expression	Endothelial	Pan immune	23	22	13.8936	29.2789	2.02e-14	1.3938e-12	****
Signature A	CX3CL1	expression	Fibroblast	Pan immune	22	22	5.76014	28.1833	3.41e-06	3.1372e-05	****
Signature A	DAPK1	expression	Malignant	Endothelial	21	23	2.19571	36.9078	0.034	0.0634054	ns
Signature A	DAPK1	expression	Malignant	Fibroblast	21	22	1.85195	40.7779	0.071	0.127247	ns
Signature A	DAPK1	expression	Malignant	Pan immune	21	22	-1.4384	36.872	0.159	0.236779	ns
Signature A	DAPK1	expression	Endothelial	Fibroblast	23	22	-0.119775	39.4104	0.905	0.928178	ns
Signature A	DAPK1	expression	Endothelial	Pan immune	23	22	-4.39409	42.9378	7.17e-05	0.0004302	***
Signature A	DAPK1	expression	Fibroblast	Pan immune	22	22	-3.62107	39.2486	0.00083	0.00293692	**
Signature A	DAPK2	expression	Malignant	Endothelial	21	23	2.5254	38.4878	0.016	0.0334545	*
Signature A	DAPK2	expression	Malignant	Fibroblast	21	22	0.855719	40.9753	0.397	0.470615	ns
Signature A	DAPK2	expression	Malignant	Pan immune	21	22	1.13988	40.9736	0.261	0.339792	ns
Signature A	DAPK2	expression	Endothelial	Fibroblast	23	22	-1.56733	39.9294	0.125	0.195371	ns
Signature A	DAPK2	expression	Endothelial	Pan immune	23	22	-1.17781	38.9277	0.246	0.326423	ns
Signature A	DAPK2	expression	Fibroblast	Pan immune	22	22	0.305814	41.8956	0.761	0.814093	ns
Signature A	DIRAS3	expression	Malignant	Endothelial	21	23	2.72898	31.9627	0.01	0.0242105	*
Signature A	DIRAS3	expression	Malignant	Fibroblast	21	22	-1.8175	35.9958	0.078	0.136253	ns
Signature A	DIRAS3	expression	Malignant	Pan immune	21	22	4.79319	20.9329	9.86e-05	0.000523338	***
Signature A	DIRAS3	expression	Endothelial	Fibroblast	23	22	-3.96892	26.7592	0.000487	0.00192017	**
Signature A	DIRAS3	expression	Endothelial	Pan immune	23	22	2.9077	25.1578	0.007	0.0178889	*
Signature A	DIRAS3	expression	Fibroblast	Pan immune	22	22	5.33288	21.4226	2.57e-05	0.00017733	***
Signature A	DLC1	expression	Malignant	Endothelial	21	23	-5.06252	30.7692	1.83e-05	0.0001403	***
Signature A	DLC1	expression	Malignant	Fibroblast	21	22	-1.77571	34.4811	0.085	0.146625	ns
Signature A	DLC1	expression	Malignant	Pan immune	21	22	5.74867	34.2989	1.77e-06	1.87892e-05	****
Signature A	DLC1	expression	Endothelial	Fibroblast	23	22	4.32177	41.1525	9.57e-05	0.000523338	***
Signature A	DLC1	expression	Endothelial	Pan immune	23	22	15.0606	41.2904	2.25e-18	3.105e-16	****
Signature A	DLC1	expression	Fibroblast	Pan immune	22	22	9.82167	41.9968	1.92e-12	8.832e-11	****
Signature A	DRAM1	expression	Malignant	Endothelial	21	23	3.54119	36.8499	0.001	0.00313636	**
Signature A	DRAM1	expression	Malignant	Fibroblast	21	22	2.27274	40.6967	0.028	0.0536667	ns
Signature A	DRAM1	expression	Malignant	Pan immune	21	22	4.46311	28.3021	0.000118	0.000581571	***
Signature A	DRAM1	expression	Endothelial	Fibroblast	23	22	-1.04282	39.6076	0.303	0.390785	ns
Signature A	DRAM1	expression	Endothelial	Pan immune	23	22	0.671575	37.5419	0.506	0.577091	ns
Signature A	DRAM1	expression	Fibroblast	Pan immune	22	22	1.7187	30.6756	0.096	0.159614	ns
Signature A	FKBP1B	expression	Malignant	Endothelial	21	23	0.0026448	38.0713	0.998	0.998	ns
Signature A	FKBP1B	expression	Malignant	Fibroblast	21	22	1.62683	40.8932	0.111	0.178116	ns
Signature A	FKBP1B	expression	Malignant	Pan immune	21	22	3.45376	33.5429	0.002	0.00575	**
Signature A	FKBP1B	expression	Endothelial	Fibroblast	23	22	1.83973	40.044	0.073	0.129154	ns
Signature A	FKBP1B	expression	Endothelial	Pan immune	23	22	4.15606	41.7268	0.000157	0.000747103	***
Signature A	FKBP1B	expression	Fibroblast	Pan immune	22	22	1.55195	35.5655	0.13	0.199333	ns
Signature A	FOS	expression	Malignant	Endothelial	21	23	-2.94253	41.9988	0.005	0.0135294	*
Signature A	FOS	expression	Malignant	Fibroblast	21	22	-3.34976	40.9203	0.002	0.00575	**
Signature A	FOS	expression	Malignant	Pan immune	21	22	0.836976	39.3711	0.408	0.477153	ns
Signature A	FOS	expression	Endothelial	Fibroblast	23	22	-0.288457	42.8958	0.774	0.817466	ns
Signature A	FOS	expression	Endothelial	Pan immune	23	22	3.9907	41.2422	0.000264	0.001104	**
Signature A	FOS	expression	Fibroblast	Pan immune	22	22	4.49028	40.9543	5.69e-05	0.000356918	***
Signature A	FOXO1	expression	Malignant	Endothelial	21	23	-9.3714	41.8525	7.78e-12	2.14728e-10	****
Signature A	FOXO1	expression	Malignant	Fibroblast	21	22	-5.7504	32.6134	2.1e-06	2.07e-05	****
Signature A	FOXO1	expression	Malignant	Pan immune	21	22	-3.48638	36.9256	0.001	0.00313636	**
Signature A	FOXO1	expression	Endothelial	Fibroblast	23	22	1.01038	35.1286	0.319	0.403872	ns
Signature A	FOXO1	expression	Endothelial	Pan immune	23	22	4.30591	39.8164	0.000105	0.000536667	***
Signature A	FOXO1	expression	Fibroblast	Pan immune	22	22	2.47272	40.1322	0.018	0.0370746	*
Signature A	GABARAPL1	expression	Malignant	Endothelial	21	23	-2.69205	41.9316	0.01	0.0242105	*
Signature A	GABARAPL1	expression	Malignant	Fibroblast	21	22	-2.52748	40.4785	0.016	0.0334545	*
Signature A	GABARAPL1	expression	Malignant	Pan immune	21	22	-1.73979	40.965	0.089	0.14978	ns
Signature A	GABARAPL1	expression	Endothelial	Fibroblast	23	22	0.0863846	42.7672	0.932	0.945706	ns
Signature A	GABARAPL1	expression	Endothelial	Pan immune	23	22	1.03682	42.7931	0.306	0.391	ns
Signature A	GABARAPL1	expression	Fibroblast	Pan immune	22	22	0.917851	41.163	0.364	0.4485	ns
Signature A	GRID1	expression	Malignant	Endothelial	21	23	-0.603457	39.043	0.55	0.617073	ns
Signature A	GRID1	expression	Malignant	Fibroblast	21	22	-2.68311	23.3559	0.013	0.0294098	*
Signature A	GRID1	expression	Malignant	Pan immune	21	22	0.852942	39.931	0.399	0.470615	ns
Signature A	GRID1	expression	Endothelial	Fibroblast	23	22	-2.38382	25.5794	0.025	0.0485915	*
Signature A	GRID1	expression	Endothelial	Pan immune	23	22	1.28542	42.3895	0.206	0.287152	ns
Signature A	GRID1	expression	Fibroblast	Pan immune	22	22	2.95601	24.4395	0.007	0.0178889	*
Signature A	HSPB8	expression	Malignant	Endothelial	21	23	-2.73516	41.4406	0.009	0.0225818	*
Signature A	HSPB8	expression	Malignant	Fibroblast	21	22	-1.42046	40.9072	0.163	0.236779	ns
Signature A	HSPB8	expression	Malignant	Pan immune	21	22	7.62958	23.4823	8.35e-08	1.44037e-06	****
Signature A	HSPB8	expression	Endothelial	Fibroblast	23	22	1.16371	41.8864	0.251	0.329886	ns
Signature A	HSPB8	expression	Endothelial	Pan immune	23	22	11.9435	26.3596	3.85e-12	1.32825e-10	****
Signature A	HSPB8	expression	Fibroblast	Pan immune	22	22	9.00791	24.1635	3.42e-09	7.866e-08	****
Signature A	ITPR1	expression	Malignant	Endothelial	21	23	-3.63189	41.6908	0.000764	0.00277453	**
Signature A	ITPR1	expression	Malignant	Fibroblast	21	22	-4.13809	40.629	0.000172	0.0007912	***
Signature A	ITPR1	expression	Malignant	Pan immune	21	22	-1.7433	40.7963	0.089	0.14978	ns
Signature A	ITPR1	expression	Endothelial	Fibroblast	23	22	-0.80777	41.6374	0.424	0.491697	ns
Signature A	ITPR1	expression	Endothelial	Pan immune	23	22	1.9402	42.9898	0.059	0.10856	ns
Signature A	ITPR1	expression	Fibroblast	Pan immune	22	22	2.5901	40.8835	0.013	0.0294098	*
Signature A	MAP1LC3C	expression	Malignant	Endothelial	21	23	1.70645	20.6253	0.103	0.167224	ns
Signature A	MAP1LC3C	expression	Malignant	Fibroblast	21	22	-2.63733	37.6921	0.012	0.0280678	*
Signature A	MAP1LC3C	expression	Malignant	Pan immune	21	22	0.893204	23.6555	0.381	0.4644	ns
Signature A	MAP1LC3C	expression	Endothelial	Fibroblast	23	22	-4.46133	21.3377	0.000208	0.000925935	***
Signature A	MAP1LC3C	expression	Endothelial	Pan immune	23	22	-2.3979	27.9747	0.023	0.0453429	*
Signature A	MAP1LC3C	expression	Fibroblast	Pan immune	22	22	3.82573	22.982	0.000867	0.00299115	**
Signature A	NLRC4	expression	Malignant	Endothelial	21	23	-0.343293	34.6858	0.733	0.790266	ns
Signature A	NLRC4	expression	Malignant	Fibroblast	21	22	-0.880542	24.6826	0.387	0.4644	ns
Signature A	NLRC4	expression	Malignant	Pan immune	21	22	-7.78334	21.6662	1.03e-07	1.4766e-06	****
Signature A	NLRC4	expression	Endothelial	Fibroblast	23	22	-0.632653	31.6785	0.532	0.60177	ns
Signature A	NLRC4	expression	Endothelial	Pan immune	23	22	-7.57652	23.0317	1.07e-07	1.4766e-06	****
Signature A	NLRC4	expression	Fibroblast	Pan immune	22	22	-6.86627	28.2904	1.74e-07	2.001e-06	****
Signature A	NRG1	expression	Malignant	Endothelial	21	23	-0.286075	40.7382	0.776	0.817466	ns
Signature A	NRG1	expression	Malignant	Fibroblast	21	22	-1.23146	38.1531	0.226	0.302796	ns
Signature A	NRG1	expression	Malignant	Pan immune	21	22	0.0637334	39.9374	0.95	0.956934	ns
Signature A	NRG1	expression	Endothelial	Fibroblast	23	22	-0.875012	42.5519	0.386	0.4644	ns
Signature A	NRG1	expression	Endothelial	Pan immune	23	22	0.355959	38.8223	0.724	0.786709	ns
Signature A	NRG1	expression	Fibroblast	Pan immune	22	22	1.34013	35.731	0.189	0.266143	ns
Signature A	NRG2	expression	Malignant	Endothelial	21	23	-1.42554	35.4971	0.163	0.236779	ns
Signature A	NRG2	expression	Malignant	Fibroblast	21	22	-0.208619	40.9643	0.836	0.867429	ns
Signature A	NRG2	expression	Malignant	Pan immune	21	22	1.42015	26.64	0.167	0.240063	ns
Signature A	NRG2	expression	Endothelial	Fibroblast	23	22	1.2765	35.5987	0.21	0.2898	ns
Signature A	NRG2	expression	Endothelial	Pan immune	23	22	2.50162	24.6455	0.019	0.0385588	*
Signature A	NRG2	expression	Fibroblast	Pan immune	22	22	1.69965	28.002	0.1	0.164286	ns
Signature A	NRG3	expression	Malignant	Endothelial	21	23	-4.1493	33.4578	0.000216	0.0009315	***
Signature A	NRG3	expression	Malignant	Fibroblast	21	22	-0.216793	34.5914	0.83	0.867429	ns
Signature A	NRG3	expression	Malignant	Pan immune	21	22	1.58711	23.7374	0.126	0.195371	ns
Signature A	NRG3	expression	Endothelial	Fibroblast	23	22	3.37314	42.5118	0.002	0.00575	**
Signature A	NRG3	expression	Endothelial	Pan immune	23	22	5.5268	23.1912	1.24e-05	0.000100659	***
Signature A	NRG3	expression	Fibroblast	Pan immune	22	22	1.24877	22.4783	0.225	0.302796	ns
Signature A	PARK2	expression	Malignant	Endothelial	21	23	-2.52838	40.6952	0.015	0.0323437	*
Signature A	PARK2	expression	Malignant	Fibroblast	21	22	-0.925458	39.1335	0.36	0.447568	ns
Signature A	PARK2	expression	Malignant	Pan immune	21	22	1.88595	36.3874	0.067	0.121658	ns
Signature A	PARK2	expression	Endothelial	Fibroblast	23	22	1.42605	42.9297	0.161	0.236779	ns
Signature A	PARK2	expression	Endothelial	Pan immune	23	22	4.41355	34.512	9.51e-05	0.000523338	***
Signature A	PARK2	expression	Fibroblast	Pan immune	22	22	2.60626	32.7489	0.014	0.0306667	*
Signature A	PPP1R15A	expression	Malignant	Endothelial	21	23	-2.9954	38.6249	0.005	0.0135294	*
Signature A	PPP1R15A	expression	Malignant	Fibroblast	21	22	-2.56141	39.4138	0.014	0.0306667	*
Signature A	PPP1R15A	expression	Malignant	Pan immune	21	22	-3.74889	40.2643	0.000558	0.00208119	**
Signature A	PPP1R15A	expression	Endothelial	Fibroblast	23	22	0.583697	42.5348	0.563	0.621552	ns
Signature A	PPP1R15A	expression	Endothelial	Pan immune	23	22	0.11579	36.7111	0.908	0.928178	ns
Signature A	PPP1R15A	expression	Fibroblast	Pan immune	22	22	-0.593563	37.931	0.556	0.618774	ns
Signature A	PRKCQ	expression	Malignant	Endothelial	21	23	1.60374	27.5787	0.12	0.190345	ns
Signature A	PRKCQ	expression	Malignant	Fibroblast	21	22	3.10646	21.5194	0.005	0.0135294	*
Signature A	PRKCQ	expression	Malignant	Pan immune	21	22	-2.26557	38.5797	0.029	0.0548219	ns
Signature A	PRKCQ	expression	Endothelial	Fibroblast	23	22	2.93061	30.2375	0.006	0.0159231	*
Signature A	PRKCQ	expression	Endothelial	Pan immune	23	22	-3.94725	25.5994	0.000548	0.00208119	**
Signature A	PRKCQ	expression	Fibroblast	Pan immune	22	22	-5.16932	21.9076	3.54e-05	0.000232629	***
Signature A	ULK2	expression	Malignant	Endothelial	21	23	0.97271	40.1218	0.337	0.422782	ns
Signature A	ULK2	expression	Malignant	Fibroblast	21	22	-2.38901	37.7677	0.022	0.044	*
Signature A	ULK2	expression	Malignant	Pan immune	21	22	1.35555	40.0381	0.183	0.260351	ns
Signature A	ULK2	expression	Endothelial	Fibroblast	23	22	-3.29949	34.8351	0.002	0.00575	**
Signature A	ULK2	expression	Endothelial	Pan immune	23	22	0.435875	42.835	0.665	0.728333	ns
Signature A	ULK2	expression	Fibroblast	Pan immune	22	22	3.58714	35.4553	0.001	0.00313636	**
Signature B	ATG9B	expression	Malignant	Endothelial	21	23	-2.09941	40.9851	0.042	0.0836757	ns
Signature B	ATG9B	expression	Malignant	Fibroblast	21	22	3.42971	23.3548	0.002	0.00553846	**
Signature B	ATG9B	expression	Malignant	Pan immune	21	22	1.24792	28.7459	0.222	0.333	ns
Signature B	ATG9B	expression	Endothelial	Fibroblast	23	22	6.7856	26.556	3e-07	3.10629e-06	****
Signature B	ATG9B	expression	Endothelial	Pan immune	23	22	4.13848	33.4589	0.000222	0.000999	***
Signature B	ATG9B	expression	Fibroblast	Pan immune	22	22	-3.91434	34.6457	0.000405	0.00162	**
Signature B	ATIC	expression	Malignant	Endothelial	21	23	7.5539	40.3743	3.03e-09	1.0908e-07	****
Signature B	ATIC	expression	Malignant	Fibroblast	21	22	2.57771	37.414	0.014	0.0325161	*
Signature B	ATIC	expression	Malignant	Pan immune	21	22	3.68774	40.7007	0.000662	0.0023832	**
Signature B	ATIC	expression	Endothelial	Fibroblast	23	22	-3.31401	34.7715	0.002	0.00553846	**
Signature B	ATIC	expression	Endothelial	Pan immune	23	22	-3.84068	42.4327	0.000404	0.00162	**
Signature B	ATIC	expression	Fibroblast	Pan immune	22	22	0.350616	36.5218	0.728	0.771882	ns
Signature B	BIRC5	expression	Malignant	Endothelial	21	23	3.68171	34.0724	0.000796	0.00272914	**
Signature B	BIRC5	expression	Malignant	Fibroblast	21	22	2.10206	40.928	0.042	0.0836757	ns
Signature B	BIRC5	expression	Malignant	Pan immune	21	22	1.62517	36.2388	0.113	0.193714	ns
Signature B	BIRC5	expression	Endothelial	Fibroblast	23	22	-1.02547	34.1269	0.312	0.423849	ns
Signature B	BIRC5	expression	Endothelial	Pan immune	23	22	-2.50335	42.2184	0.016	0.0349091	*
Signature B	BIRC5	expression	Fibroblast	Pan immune	22	22	-0.851624	36.3205	0.4	0.505263	ns
Signature B	BNIP3	expression	Malignant	Endothelial	21	23	2.86044	35.0078	0.007	0.0186667	*
Signature B	BNIP3	expression	Malignant	Fibroblast	21	22	1.98527	39.7615	0.054	0.102316	ns
Signature B	BNIP3	expression	Malignant	Pan immune	21	22	5.74007	32.9569	2.08e-06	1.248e-05	****
Signature B	BNIP3	expression	Endothelial	Fibroblast	23	22	-0.201247	32.216	0.842	0.866057	ns
Signature B	BNIP3	expression	Endothelial	Pan immune	23	22	3.68404	42.826	0.00064	0.0023832	**
Signature B	BNIP3	expression	Fibroblast	Pan immune	22	22	2.60481	30.5406	0.014	0.0325161	*
Signature B	CDKN2A	expression	Malignant	Endothelial	21	23	1.2701	39.1968	0.212	0.324766	ns
Signature B	CDKN2A	expression	Malignant	Fibroblast	21	22	1.32962	40.3707	0.191	0.303652	ns
Signature B	CDKN2A	expression	Malignant	Pan immune	21	22	1.74432	34.0953	0.09	0.162	ns
Signature B	CDKN2A	expression	Endothelial	Fibroblast	23	22	0.292047	37.5649	0.772	0.805565	ns
Signature B	CDKN2A	expression	Endothelial	Pan immune	23	22	0.430443	41.2819	0.669	0.741046	ns
Signature B	CDKN2A	expression	Fibroblast	Pan immune	22	22	0.0208006	32.5072	0.984	0.984	ns
Signature B	EIF4EBP1	expression	Malignant	Endothelial	21	23	0.513448	38.5201	0.611	0.709548	ns
Signature B	EIF4EBP1	expression	Malignant	Fibroblast	21	22	0.746184	40.2603	0.46	0.561356	ns
Signature B	EIF4EBP1	expression	Malignant	Pan immune	21	22	1.33892	40.1248	0.188	0.303652	ns
Signature B	EIF4EBP1	expression	Endothelial	Fibroblast	23	22	0.357372	36.5558	0.723	0.771882	ns
Signature B	EIF4EBP1	expression	Endothelial	Pan immune	23	22	0.969561	41.9681	0.338	0.434571	ns
Signature B	EIF4EBP1	expression	Fibroblast	Pan immune	22	22	0.432141	38.9932	0.668	0.741046	ns
Signature B	ERO1L	expression	Malignant	Endothelial	21	23	3.62263	31.5349	0.001	0.003	**
Signature B	ERO1L	expression	Malignant	Fibroblast	21	22	2.79894	38.9621	0.008	0.0205714	*
Signature B	ERO1L	expression	Malignant	Pan immune	21	22	4.23884	32.9462	0.00017	0.000816	***
Signature B	ERO1L	expression	Endothelial	Fibroblast	23	22	-0.546074	37.4237	0.588	0.694033	ns
Signature B	ERO1L	expression	Endothelial	Pan immune	23	22	0.977134	42.5718	0.334	0.434571	ns
Signature B	ERO1L	expression	Fibroblast	Pan immune	22	22	1.32332	38.6618	0.194	0.303652	ns
Signature B	GAPDH	expression	Malignant	Endothelial	21	23	1.11311	39.2978	0.272	0.384	ns
Signature B	GAPDH	expression	Malignant	Fibroblast	21	22	0.123376	40.0614	0.902	0.914704	ns
Signature B	GAPDH	expression	Malignant	Pan immune	21	22	2.54487	39.843	0.015	0.03375	*
Signature B	GAPDH	expression	Endothelial	Fibroblast	23	22	-1.06131	42.473	0.295	0.408462	ns
Signature B	GAPDH	expression	Endothelial	Pan immune	23	22	1.63858	42.6247	0.109	0.191415	ns
Signature B	GAPDH	expression	Fibroblast	Pan immune	22	22	2.59601	41.9869	0.013	0.0322759	*
Signature B	IKBKE	expression	Malignant	Endothelial	21	23	5.98886	34.9168	8.06e-07	7.032e-06	****
Signature B	IKBKE	expression	Malignant	Fibroblast	21	22	-1.23155	34.2594	0.227	0.333551	ns
Signature B	IKBKE	expression	Malignant	Pan immune	21	22	-2.23449	37.6798	0.032	0.0677647	ns
Signature B	IKBKE	expression	Endothelial	Fibroblast	23	22	-5.3459	27.3685	1.16e-05	5.96571e-05	****
Signature B	IKBKE	expression	Endothelial	Pan immune	23	22	-7.13362	29.8402	6.38e-08	9.1872e-07	****
Signature B	IKBKE	expression	Fibroblast	Pan immune	22	22	-0.667547	40.7848	0.508	0.6096	ns
Signature B	ITGB4	expression	Malignant	Endothelial	21	23	-1.51842	35.8595	0.138	0.23107	ns
Signature B	ITGB4	expression	Malignant	Fibroblast	21	22	5.62035	39.8848	1.63e-06	1.06691e-05	****
Signature B	ITGB4	expression	Malignant	Pan immune	21	22	7.34343	40.7316	5.63e-09	1.3512e-07	****
Signature B	ITGB4	expression	Endothelial	Fibroblast	23	22	7.66934	33.1754	7.61e-09	1.3698e-07	****
Signature B	ITGB4	expression	Endothelial	Pan immune	23	22	10.2497	38.5711	1.44e-12	1.0368e-10	****
Signature B	ITGB4	expression	Fibroblast	Pan immune	22	22	0.820653	39.61	0.417	0.517655	ns
Signature B	P4HB	expression	Malignant	Endothelial	21	23	3.57568	36.6021	0.001	0.003	**
Signature B	P4HB	expression	Malignant	Fibroblast	21	22	1.16917	40.5755	0.249	0.35856	ns
Signature B	P4HB	expression	Malignant	Pan immune	21	22	5.01515	40.4041	1.1e-05	5.96571e-05	****
Signature B	P4HB	expression	Endothelial	Fibroblast	23	22	-1.94917	35.298	0.059	0.108923	ns
Signature B	P4HB	expression	Endothelial	Pan immune	23	22	2.08588	40.0716	0.043	0.0836757	ns
Signature B	P4HB	expression	Fibroblast	Pan immune	22	22	3.44117	40.0451	0.001	0.003	**
Signature B	PTK6	expression	Malignant	Endothelial	21	23	6.56895	29.6895	3.02e-07	3.10629e-06	****
Signature B	PTK6	expression	Malignant	Fibroblast	21	22	6.00378	33.7121	8.79e-07	7.032e-06	****
Signature B	PTK6	expression	Malignant	Pan immune	21	22	6.32262	25.3673	1.2e-06	8.64e-06	****
Signature B	PTK6	expression	Endothelial	Fibroblast	23	22	-0.349484	40.7743	0.729	0.771882	ns
Signature B	PTK6	expression	Endothelial	Pan immune	23	22	-0.985809	39.9139	0.33	0.434571	ns
Signature B	PTK6	expression	Fibroblast	Pan immune	22	22	-0.462926	34.1064	0.646	0.738286	ns
