# Supplementary material for: Autophagy-Related Gene Signature Highlights Metabolic and Immunogenic Status of Malignant Cells in Non-Small Cell Lung Cancer Adenocarcinoma
Source: Cancers (Basel). 2022 Jul 16;14(14):3462. doi: 10.3390/cancers14143462 (PMC9317787; doi:10.3390/cancers14143462)
Supplement: Supplementary file 1 [file cancers-14-03462-s001.zip › Table S4.xlsx]

## Sheet: Sheet1
Table S4. Statistical report for figure S3B
Cells	group1	group2	n1	n2	statistic	df	p	p.adj	p.adj.signif
HAD	Tumor cells	Endothelium	584	121	0.0328559	165.372	0.974	0.974	ns
HAD	Tumor cells	Fibroblast	584	288	-0.663047	567.495	0.508	0.537891	ns
HAD	Tumor cells	NK cells	584	2362	2.42171	660.824	0.016	0.0225	*
HAD	Tumor cells	Monocytes	584	1394	-5.61176	1157.21	2.5e-08	6.13636e-08	****
HAD	Tumor cells	Mast cells	584	432	1.40964	1008.1	0.159	0.191652	ns
HAD	Tumor cells	CD8 T cells	584	806	-6.76618	905.858	2.37e-11	6.80745e-11	****
HAD	Tumor cells	CD4 T cells	584	6511	12.2029	639.278	6.16e-31	2.97e-30	****
HAD	Tumor cells	B cells	584	1882	5.05278	740.133	5.49e-07	1.27784e-06	****
HAD	Tumor cells	T reg	584	818	-4.50842	849.549	7.45e-06	1.64877e-05	****
HAD	Endothelium	Fibroblast	121	288	-0.448846	212.054	0.654	0.673969	ns
HAD	Endothelium	NK cells	121	2362	1.01222	122.797	0.313	0.349215	ns
HAD	Endothelium	Monocytes	121	1394	-2.79236	140.961	0.006	0.00910112	**
HAD	Endothelium	Mast cells	121	432	0.721907	158.539	0.471	0.504643	ns
HAD	Endothelium	CD8 T cells	121	806	-3.18644	132.275	0.002	0.00317647	**
HAD	Endothelium	CD4 T cells	121	6511	5.20728	122.024	7.88e-07	1.80305e-06	****
HAD	Endothelium	B cells	121	1882	2.20318	125.59	0.029	0.03915	*
HAD	Endothelium	T reg	121	818	-2.10088	129.964	0.038	0.0493269	*
HAD	Fibroblast	NK cells	288	2362	2.51031	305.425	0.013	0.0184737	*
HAD	Fibroblast	Monocytes	288	1394	-3.55133	429.45	0.000426	0.000737308	***
HAD	Fibroblast	Mast cells	288	432	1.80388	517.124	0.072	0.09	ns
HAD	Fibroblast	CD8 T cells	288	806	-4.24842	368.471	2.73e-05	5.3413e-05	****
HAD	Fibroblast	CD4 T cells	288	6511	9.4025	300.315	1.42e-18	5.47714e-18	****
HAD	Fibroblast	B cells	288	1882	4.41342	324.078	1.39e-05	2.80075e-05	****
HAD	Fibroblast	T reg	288	818	-2.53769	353.029	0.012	0.0174194	*
HAD	NK cells	Monocytes	2362	1394	-12.6865	1783.18	2.26e-35	1.2204e-34	****
HAD	NK cells	Mast cells	2362	432	-0.598293	498.18	0.55	0.575581	ns
HAD	NK cells	CD8 T cells	2362	806	-17.2457	1198.7	1.05e-59	7.875e-59	****
HAD	NK cells	CD4 T cells	2362	6511	29.7838	5899.26	1.02e-181	1.04625e-179	****
HAD	NK cells	B cells	2362	1882	6.50348	3536.22	8.95e-11	2.46582e-10	****
HAD	NK cells	T reg	2362	818	-13.8096	1310.32	1.34e-40	7.86522e-40	****
HAD	Monocytes	Mast cells	1394	432	7.55967	946.346	9.54e-14	2.99512e-13	****
HAD	Monocytes	CD8 T cells	1394	806	-0.976506	2197.55	0.329	0.364057	ns
HAD	Monocytes	CD4 T cells	1394	6511	26.745	1681.36	1.36e-131	3.06e-130	****
HAD	Monocytes	B cells	1394	1882	15.6862	2141.48	1.41e-52	9.5175e-52	****
HAD	Monocytes	T reg	1394	818	2.16161	2192.54	0.031	0.0414356	*
HAD	Mast cells	CD8 T cells	432	806	-8.96208	717.941	2.72e-18	9.92432e-18	****
HAD	Mast cells	CD4 T cells	432	6511	11.0807	479.473	1.46e-25	6.57e-25	****
HAD	Mast cells	B cells	432	1882	3.46189	567.516	0.000577	0.000986013	***
HAD	Mast cells	T reg	432	818	-6.62657	666.364	7.09e-11	1.99406e-10	****
HAD	CD8 T cells	CD4 T cells	806	6511	35.1206	1093.76	1.55e-181	1.04625e-179	****
HAD	CD8 T cells	B cells	806	1882	20.3131	1573.47	1.18e-81	1.13786e-80	****
HAD	CD8 T cells	T reg	806	818	3.72098	1602.79	0.000205	0.000369	***
HAD	CD4 T cells	B cells	6511	1882	-16.9216	3372.56	1.03e-61	8.17941e-61	****
HAD	CD4 T cells	T reg	6511	818	-33.2318	1181.57	1.6e-171	7.2e-170	****
HAD	B cells	T reg	1882	818	-17.2994	1756.77	4.88e-62	4.1175e-61	****
GC	Tumor cells	Endothelium	584	121	-0.201146	168.072	0.841	0.853647	ns
GC	Tumor cells	Fibroblast	584	288	-1.70777	554.854	0.088	0.108	ns
GC	Tumor cells	NK cells	584	2362	4.48246	699.44	8.62e-06	1.84714e-05	****
GC	Tumor cells	Monocytes	584	1394	-6.27961	1189.6	4.75e-10	1.2825e-09	****
GC	Tumor cells	Mast cells	584	432	1.90203	1012.13	0.058	0.0738679	ns
GC	Tumor cells	CD8 T cells	584	806	-4.44735	991.425	9.68e-06	2.04188e-05	****
GC	Tumor cells	CD4 T cells	584	6511	12.8667	639.632	7.4e-34	3.84231e-33	****
GC	Tumor cells	B cells	584	1882	3.3137	782.637	0.000963	0.001605	**
GC	Tumor cells	T reg	584	818	-3.19892	955.267	0.001	0.00162651	**
GC	Endothelium	Fibroblast	121	288	-0.925416	222.129	0.356	0.387581	ns
GC	Endothelium	NK cells	121	2362	2.23297	124.389	0.027	0.0371939	*
GC	Endothelium	Monocytes	121	1394	-2.97822	143.57	0.003	0.0047093	**
GC	Endothelium	Mast cells	121	432	1.23654	158.064	0.218	0.251538	ns
GC	Endothelium	CD8 T cells	121	806	-1.96647	136.952	0.051	0.0655714	ns
GC	Endothelium	CD4 T cells	121	6511	5.89917	122.152	3.34e-08	8.05179e-08	****
GC	Endothelium	B cells	121	1882	1.74143	127.469	0.084	0.104037	ns
GC	Endothelium	T reg	121	818	-1.33774	135.178	0.183	0.214826	ns
GC	Fibroblast	NK cells	288	2362	5.14004	313.079	4.85e-07	1.14868e-06	****
GC	Fibroblast	Monocytes	288	1394	-2.85049	430.579	0.005	0.00767045	**
GC	Fibroblast	Mast cells	288	432	3.24509	494.668	0.001	0.00162651	**
GC	Fibroblast	CD8 T cells	288	806	-1.35626	388.129	0.176	0.208421	ns
GC	Fibroblast	CD4 T cells	288	6511	10.892	299.728	1.69e-23	7.12969e-23	****
GC	Fibroblast	B cells	288	1882	4.33228	331.634	1.96e-05	3.89118e-05	****
GC	Fibroblast	T reg	288	818	-0.410137	377.538	0.682	0.6975	ns
GC	NK cells	Monocytes	2362	1394	-16.0158	1938.39	2.59e-54	1.84026e-53	****
GC	NK cells	Mast cells	2362	432	-2.25007	539.054	0.025	0.0347938	*
GC	NK cells	CD8 T cells	2362	806	-14.5469	1256.38	2.01e-44	1.29214e-43	****
GC	NK cells	CD4 T cells	2362	6511	22.3238	4833.2	3.81e-105	5.1435e-104	****
GC	NK cells	B cells	2362	1882	-2.19595	3724.84	0.028	0.0381818	*
GC	NK cells	T reg	2362	818	-12.8561	1328.47	9.75e-36	5.48438e-35	****
GC	Monocytes	Mast cells	1394	432	8.9641	1013.21	1.48e-18	5.55e-18	****
GC	Monocytes	CD8 T cells	1394	806	2.68205	2169.38	0.007	0.0103846	*
GC	Monocytes	CD4 T cells	1394	6511	28.1492	1666.27	5.99e-143	2.02163e-141	****
GC	Monocytes	B cells	1394	1882	13.8172	2269.68	9.37e-42	5.74977e-41	****
GC	Monocytes	T reg	1394	818	4.3995	2203.68	1.14e-05	2.36769e-05	****
GC	Mast cells	CD8 T cells	432	806	-7.16252	820.438	1.76e-12	5.4e-12	****
GC	Mast cells	CD4 T cells	432	6511	11.4867	483.236	3.62e-27	1.68517e-26	****
GC	Mast cells	B cells	432	1882	1.03394	617.649	0.302	0.33975	ns
GC	Mast cells	T reg	432	818	-5.8614	784.974	6.76e-09	1.69e-08	****
GC	CD8 T cells	CD4 T cells	806	6511	28.5682	1025.76	1.54e-132	4.158e-131	****
GC	CD8 T cells	B cells	806	1882	12.058	1552.38	4.54e-32	2.27e-31	****
GC	CD8 T cells	T reg	806	818	1.81297	1615.94	0.07	0.0883178	ns
GC	CD4 T cells	B cells	6511	1882	-20.8896	3060.03	1.07e-90	1.11115e-89	****
GC	CD4 T cells	T reg	6511	818	-27.4912	1067.92	3.02e-126	5.82429e-125	****
GC	B cells	T reg	1882	818	-10.354	1654.49	2.19e-24	9.5371e-24	****
Core	Tumor cells	Endothelium	584	121	0.038731	170.309	0.969	0.974	ns
Core	Tumor cells	Fibroblast	584	288	-2.11605	581.96	0.035	0.0458738	*
Core	Tumor cells	NK cells	584	2362	-2.52297	740.723	0.012	0.0174194	*
Core	Tumor cells	Monocytes	584	1394	-4.73888	1220.32	2.4e-06	5.4e-06	****
Core	Tumor cells	Mast cells	584	432	0.93334	1009.14	0.351	0.385244	ns
Core	Tumor cells	CD8 T cells	584	806	-8.07776	1084.98	1.74e-15	6.02308e-15	****
Core	Tumor cells	CD4 T cells	584	6511	7.68834	652.96	5.5e-14	1.76786e-13	****
Core	Tumor cells	B cells	584	1882	-4.40359	866.009	1.2e-05	2.45455e-05	****
Core	Tumor cells	T reg	584	818	-7.12421	1058.04	1.93e-12	5.79e-12	****
Core	Endothelium	Fibroblast	121	288	-1.40428	215.921	0.162	0.19354	ns
Core	Endothelium	NK cells	121	2362	-1.2142	126.166	0.227	0.259703	ns
Core	Endothelium	Monocytes	121	1394	-2.50993	146.053	0.013	0.0184737	*
Core	Endothelium	Mast cells	121	432	0.481114	162.046	0.631	0.655269	ns
Core	Endothelium	CD8 T cells	121	806	-4.1884	142.884	4.89e-05	9.43071e-05	****
Core	Endothelium	CD4 T cells	121	6511	3.44002	122.766	0.000795	0.00134156	**
Core	Endothelium	B cells	121	1882	-2.15564	130.979	0.033	0.0436765	*
Core	Endothelium	T reg	121	818	-3.66798	141.205	0.000346	0.000606623	***
Core	Fibroblast	NK cells	288	2362	0.660086	326.278	0.51	0.537891	ns
Core	Fibroblast	Monocytes	288	1394	-1.41565	457.273	0.158	0.191652	ns
Core	Fibroblast	Mast cells	288	432	2.93126	525.501	0.004	0.0062069	**
Core	Fibroblast	CD8 T cells	288	806	-3.96142	432.882	8.71e-05	0.000161075	***
Core	Fibroblast	CD4 T cells	288	6511	8.15077	304.483	9.5e-15	3.20625e-14	****
Core	Fibroblast	B cells	288	1882	-0.846478	357.607	0.398	0.42984	ns
Core	Fibroblast	T reg	288	818	-3.17645	422.291	0.002	0.00317647	**
Core	NK cells	Monocytes	2362	1394	-3.9166	2084.56	9.27e-05	0.000169115	***
Core	NK cells	Mast cells	2362	432	3.99263	570	7.39e-05	0.000140514	***
Core	NK cells	CD8 T cells	2362	806	-9.19007	1278.05	1.54e-19	6.11471e-19	****
Core	NK cells	CD4 T cells	2362	6511	24.4285	4631.35	4.47e-124	7.54312e-123	****
Core	NK cells	B cells	2362	1882	-3.67573	3675.98	0.000241	0.000428092	***
Core	NK cells	T reg	2362	818	-7.78875	1334.51	1.35e-14	4.44512e-14	****
Core	Monocytes	Mast cells	1394	432	6.07164	1013.5	1.79e-09	4.73824e-09	****
Core	Monocytes	CD8 T cells	1394	806	-3.93337	2101.13	8.65e-05	0.000161075	***
Core	Monocytes	CD4 T cells	1394	6511	17.9624	1713.29	3.11e-66	2.799e-65	****
Core	Monocytes	B cells	1394	1882	1.12471	2509.64	0.261	0.296092	ns
Core	Monocytes	T reg	1394	818	-2.72377	2148.5	0.007	0.0103846	*
Core	Mast cells	CD8 T cells	432	806	-9.6316	892.333	5.9e-21	2.41364e-20	****
Core	Mast cells	CD4 T cells	432	6511	6.9686	492.202	1.03e-11	3.02283e-11	****
Core	Mast cells	B cells	432	1882	-5.92313	682.831	5.01e-09	1.28377e-08	****
Core	Mast cells	T reg	432	818	-8.64937	865.942	2.49e-17	8.84605e-17	****
Core	CD8 T cells	CD4 T cells	806	6511	24.3768	1016.38	1.02e-103	1.25182e-102	****
Core	CD8 T cells	B cells	806	1882	5.87788	1617.13	5.04e-09	1.28377e-08	****
Core	CD8 T cells	T reg	806	818	1.31907	1618.82	0.187	0.217629	ns
Core	CD4 T cells	B cells	6511	1882	-23.8728	2911.03	3.48e-115	5.22e-114	****
Core	CD4 T cells	T reg	6511	818	-23.4018	1048.78	8.73e-98	9.82125e-97	****
Core	B cells	T reg	1882	818	-4.48451	1697.06	7.8e-06	1.69839e-05	****
