# Supplementary material for: Autophagy-Related Gene Signature Highlights Metabolic and Immunogenic Status of Malignant Cells in Non-Small Cell Lung Cancer Adenocarcinoma
Source: Cancers (Basel). 2022 Jul 16;14(14):3462. doi: 10.3390/cancers14143462 (PMC9317787; doi:10.3390/cancers14143462)
Supplement: Supplementary file 1 [file cancers-14-03462-s001.zip › Table S5.xlsx]

## Sheet: Sheet1
Table S5. Statistical report for figure 5E.
Cells	group1	group2	n1	n2	statistic	df	p	p.adj	p.adj.signif
Signature A	Tumor cells	Endothelium	584	121	-3.87988	149.288	0.000156	0.000234	***
Signature A	Tumor cells	Fibroblast	584	288	-3.2666	517.328	0.001	0.00145161	**
Signature A	Tumor cells	NK cells	584	2362	-4.64721	813.61	3.92e-06	6.3e-06	****
Signature A	Tumor cells	Monocytes	584	1394	-4.55364	1181.21	5.82e-06	9.18947e-06	****
Signature A	Tumor cells	Mast cells	584	432	-4.91177	969.593	1.06e-06	1.76667e-06	****
Signature A	Tumor cells	CD8 T cells	584	806	-10.2602	1197.48	9.89e-24	3.17893e-23	****
Signature A	Tumor cells	CD4 T cells	584	6511	4.96223	667.29	8.86e-07	1.50453e-06	****
Signature A	Tumor cells	B cells	584	1882	5.707	816.264	1.61e-08	3.08298e-08	****
Signature A	Tumor cells	T reg	584	818	-4.64603	1163.38	3.77e-06	6.16909e-06	****
Signature A	Endothelium	Fibroblast	121	288	1.75252	194.909	0.081	0.0985135	ns
Signature A	Endothelium	NK cells	121	2362	2.34406	125.285	0.021	0.0273913	*
Signature A	Endothelium	Monocytes	121	1394	2.13592	134.24	0.034	0.0430986	*
Signature A	Endothelium	Mast cells	121	432	1.54889	153.112	0.123	0.145658	ns
Signature A	Endothelium	CD8 T cells	121	806	-0.354126	137.954	0.724	0.757674	ns
Signature A	Endothelium	CD4 T cells	121	6511	5.83203	121.975	4.59e-08	8.60625e-08	****
Signature A	Endothelium	B cells	121	1882	6.16131	125.384	9.06e-09	1.812e-08	****
Signature A	Endothelium	T reg	121	818	2.04593	136.311	0.043	0.05375	ns
Signature A	Fibroblast	NK cells	288	2362	0.659565	330.325	0.51	0.566667	ns
Signature A	Fibroblast	Monocytes	288	1394	0.335765	406.085	0.737	0.762414	ns
Signature A	Fibroblast	Mast cells	288	432	-0.53112	529.088	0.596	0.638571	ns
Signature A	Fibroblast	CD8 T cells	288	806	-3.88259	434.786	0.000119	0.000181525	***
Signature A	Fibroblast	CD4 T cells	288	6511	6.97581	303.001	1.92e-11	4.32e-11	****
Signature A	Fibroblast	B cells	288	1882	7.48156	331.096	6.67e-13	1.62243e-12	****
Signature A	Fibroblast	T reg	288	818	0.192196	421.299	0.848	0.857528	ns
Signature A	NK cells	Monocytes	2362	1394	-0.611912	2436.87	0.541	0.586627	ns
Signature A	NK cells	Mast cells	2362	432	-1.83728	581.813	0.067	0.0826027	ns
Signature A	NK cells	CD8 T cells	2362	806	-8.90463	1320.21	1.73e-18	4.71818e-18	****
Signature A	NK cells	CD4 T cells	2362	6511	20.1308	4252.27	3.65e-86	4.10625e-85	****
Signature A	NK cells	B cells	2362	1882	18.4011	4178.64	8.99e-73	7.35545e-72	****
Signature A	NK cells	T reg	2362	818	-0.866522	1391.95	0.386	0.43425	ns
Signature A	Monocytes	Mast cells	1394	432	-1.25813	840.343	0.209	0.244286	ns
Signature A	Monocytes	CD8 T cells	1394	806	-7.09781	1900.85	1.78e-12	4.10769e-12	****
Signature A	Monocytes	CD4 T cells	1394	6511	14.2407	1808.11	1.08e-43	5.4e-43	****
Signature A	Monocytes	B cells	1394	1882	14.2547	2405.47	2.54e-44	1.34471e-43	****
Signature A	Monocytes	T reg	1394	818	-0.239416	1981.67	0.811	0.829432	ns
Signature A	Mast cells	CD8 T cells	432	806	-4.45084	890.336	9.64e-06	1.49586e-05	****
Signature A	Mast cells	CD4 T cells	432	6511	11.2247	485.923	3.73e-26	1.3428e-25	****
Signature A	Mast cells	B cells	432	1882	11.654	584.002	2.3e-28	8.625e-28	****
Signature A	Mast cells	T reg	432	818	1.04227	856.634	0.298	0.339494	ns
Signature A	CD8 T cells	CD4 T cells	806	6511	21.8884	995.387	5.18e-87	6.66e-86	****
Signature A	CD8 T cells	B cells	806	1882	21.4201	1319.66	1.35e-87	2.025e-86	****
Signature A	CD8 T cells	T reg	806	818	6.65557	1617.26	3.85e-11	8.25e-11	****
Signature A	CD4 T cells	B cells	6511	1882	2.14193	3392.51	0.032	0.0411429	*
Signature A	CD4 T cells	T reg	6511	818	-13.7298	1030.05	1.61e-39	6.9e-39	****
Signature A	B cells	T reg	1882	818	-13.8509	1389.57	5.79e-41	2.74263e-40	****
Signature B	Tumor cells	Endothelium	584	121	7.5822	211.927	1.05e-12	2.48684e-12	****
Signature B	Tumor cells	Fibroblast	584	288	7.46852	681.904	2.49e-13	6.40286e-13	****
Signature B	Tumor cells	NK cells	584	2362	18.9812	688.177	6.26e-65	4.695e-64	****
Signature B	Tumor cells	Monocytes	584	1394	7.3172	921.781	5.5e-13	1.375e-12	****
Signature B	Tumor cells	Mast cells	584	432	16.214	992.725	1.25e-52	8.03571e-52	****
Signature B	Tumor cells	CD8 T cells	584	806	9.18383	975.562	2.43e-19	6.83438e-19	****
Signature B	Tumor cells	CD4 T cells	584	6511	24.4271	629.714	3.24e-93	9.72e-92	****
Signature B	Tumor cells	B cells	584	1882	23.1782	716.453	4.06e-89	7.308e-88	****
Signature B	Tumor cells	T reg	584	818	13.4428	909.76	1.04e-37	4.25455e-37	****
Signature B	Endothelium	Fibroblast	121	288	-1.68985	237.484	0.092	0.1104	ns
Signature B	Endothelium	NK cells	121	2362	2.79285	127.35	0.006	0.00818182	**
Signature B	Endothelium	Monocytes	121	1394	-3.75921	143.974	0.000247	0.000364426	***
Signature B	Endothelium	Mast cells	121	432	2.79397	167.72	0.006	0.00818182	**
Signature B	Endothelium	CD8 T cells	121	806	-2.38609	150.38	0.018	0.0238235	*
Signature B	Endothelium	CD4 T cells	121	6511	5.79696	123.282	5.31e-08	9.75306e-08	****
Signature B	Endothelium	B cells	121	1882	5.45328	129.329	2.42e-07	4.18846e-07	****
Signature B	Endothelium	T reg	121	818	0.150617	144.548	0.88	0.88	ns
Signature B	Fibroblast	NK cells	288	2362	6.90249	324.863	2.69e-11	5.90488e-11	****
Signature B	Fibroblast	Monocytes	288	1394	-2.50642	412.244	0.013	0.0174627	*
Signature B	Fibroblast	Mast cells	288	432	6.27818	508.219	7.35e-10	1.53837e-09	****
Signature B	Fibroblast	CD8 T cells	288	806	-0.620192	442.727	0.535	0.586627	ns
Signature B	Fibroblast	CD4 T cells	288	6511	11.3342	303.805	4.52e-25	1.56462e-24	****
Signature B	Fibroblast	B cells	288	1882	10.6644	335.156	4.67e-23	1.44931e-22	****
Signature B	Fibroblast	T reg	288	818	2.92646	413.147	0.004	0.005625	**
Signature B	NK cells	Monocytes	2362	1394	-19.0737	2276.28	2.32e-75	2.088e-74	****
Signature B	NK cells	Mast cells	2362	432	0.450899	577.818	0.652	0.690353	ns
Signature B	NK cells	CD8 T cells	2362	806	-13.8017	1232	2.14e-40	9.63e-40	****
Signature B	NK cells	CD4 T cells	2362	6511	14.3448	4623.96	1.08e-45	6.48e-45	****
Signature B	NK cells	B cells	2362	1882	10.4077	4026.09	4.74e-25	1.58e-24	****
Signature B	NK cells	T reg	2362	818	-7.46739	1351.84	1.46e-13	3.86471e-13	****
Signature B	Monocytes	Mast cells	1394	432	13.1029	908.94	4.68e-36	1.8313e-35	****
Signature B	Monocytes	CD8 T cells	1394	806	3.02896	1898.81	0.002	0.00285714	**
Signature B	Monocytes	CD4 T cells	1394	6511	29.547	1808.41	6.82e-157	6.138e-155	****
Signature B	Monocytes	B cells	1394	1882	25.9316	2438.3	3.81e-131	1.7145e-129	****
Signature B	Monocytes	T reg	1394	818	9.29052	2045.64	3.8e-20	1.10323e-19	****
Signature B	Mast cells	CD8 T cells	432	806	-10.0274	951.789	1.45e-22	4.35e-22	****
Signature B	Mast cells	CD4 T cells	432	6511	6.21543	495.358	1.09e-09	2.22955e-09	****
Signature B	Mast cells	B cells	432	1882	5.27948	618.023	1.8e-07	3.17647e-07	****
Signature B	Mast cells	T reg	432	818	-5.39608	873.517	8.78e-08	1.5804e-07	****
Signature B	CD8 T cells	CD4 T cells	806	6511	22.8225	994.913	4.72e-93	1.062e-91	****
Signature B	CD8 T cells	B cells	806	1882	20.2786	1337.88	6.15e-80	6.15e-79	****
Signature B	CD8 T cells	T reg	806	818	5.7353	1602.78	1.16e-08	2.26957e-08	****
Signature B	CD4 T cells	B cells	6511	1882	-1.22946	3335.24	0.219	0.252692	ns
Signature B	CD4 T cells	T reg	6511	818	-16.9755	1055.88	2.48e-57	1.71692e-56	****
Signature B	B cells	T reg	1882	818	-14.6122	1478.21	2.87e-45	1.61438e-44	****
